# Supplementary material for: Asymmetric aza-Diels-Alder reaction of Danishefsky's diene with imines in a chiral reaction medium
Source: Beilstein J Org Chem. 2006 Sep 18;2:18. doi: 10.1186/1860-5397-2-18 (PMC1592496; doi:10.1186/1860-5397-2-18)
Supplement: File 1 — Experimental procedures and full spectroscopic data for all new compounds. [file Beilstein_J_Org_Chem-02-18-s001.doc]

**Supporting Information for**

Asymmetric Aza-Diels-Alder Reaction of Danishefsky’s Diene with Imines in a Chiral Reaction Medium

Bruce Pégot, Olivier Nguyen Van Buu, Didier Gori, Giang Vo-Thanh*

Laboratoire de Chimie des Procédés et Substances Naturelles, ICMMO, CNRS UMR 8182, Université Paris-Sud, 91405 Orsay Cedex, France.

*E-mail :* [*gvothanh@icmo.u-psud.fr*](mailto:gvothanh@icmo.u-psud.fr)

**General Considerations**

Melting points were measured on a Kofler bank. The NMR spectra were recorded in CDCl3. 1H NMR spectra were recorded at 360 or 250 MHz. The chemical shifts () are reported in ppm relative to the TMS as internal standard. *J* values are given in Hz. 13C NMR spectra were recorded at 90 or 62.5 MHz. IR spectra were recorded on a FT-IR Perkin-Elmer instrument. TLC was carried out with 0.2 mm thick silica gel plates (GF254). Visualization was accomplished by UV light or phosphomolybdic acid solution. The columns were hand packed with silica gel 60 (200-300). Conversions and yields were estimated by GC using octadecyl acrylate as an internal standard. The GC device (GC 9000 series Fisons,) was fitted with a non polar capillary column, film thickness: 0.1 µm, carrier gas: helium. GC equipment fitted with a hardware (NCI 900 series interface) and software (Turbochrom) system developed by Perkin Elmer Co. Diastreomeric excesses were determined by chiral HPLC (Perkin Elmer), which was fitted with a chiral *(S,S*)-whelk-01 column 4.6 mm x 250 mm (thermostatted column 0-1°C).

All reagents and solvents were purchased from commercial sources (Acros, Aldrich) and were used without further purification.

**General Procedure for the asymmetric aza Diels-Alder Reaction of Danishefsky’s Diene with Imines**

A mixture of imine **2** (1 mmol), chiral ionic liquid **4** (2 equiv.) and Danishefsky’s diene **1** (1.5 equiv. added in three phases) was stirred at 30°C for 4.30 hours. The reaction mixture was extracted from the ionic liquid phase with Et2O (10 mL x 3). The ether layer was dried over anhydrous MgSO4 and evaporated under reduced pressure. The residue was purified by flash column chromatography (AcOEt / pentane = 10 / 90 to 70 / 30) to provide **3**.

The chiral ionic liquid was dissolved in dichloromethane (20 mL) and then recycled by washing with water (10 mL x 2). The organic phase was dried over anhydrous MgSO4, filtered and evaporated in *vacuo* to afford the recycled ionic liquid. Spectra data (IR, 1H and 13C) were identical to the initial ionic liquid sample. This IL was reused without loss of efficiency (Table 3, entry 1).

**Spectral Data for Products**

**(2*S*)-2,3-dihydro-2-phenyl-1-((*R*)-1-phenylethyl)pyridine-4-(1*H*)-one 3a**

Mp: 74°C; [α]D26: + 183.7 (c 1.96, CHCl3) (ed = 97% determined by chral HPLC). IR (neat): 3029, 2975, 1639, 1590, 1494, 1451, 1393, 1294, 1152, 762, 700 cm-1. 1H NMR (CDCl3) δ 1.45 (d, 3H, *J* = 6.8 Hz), 2.55-2.88 (m, 2H), 4.43 (q, 1H, *J* = 6.8 Hz), 4.70 (dd, 1H, *J* = 6.8, 8.8 Hz), 5.04 (d, 1H, *J* = 7.0 Hz), 7.06 (d, 1H, *J* = 7.0 Hz), 7.09-7.42 (m, 10H). 13C NMR (CDCl3) δ 17.4, 43.2, 59.0, 60.2, 98.0, 125.8, 126.4, 127.3, 128.0, 128.3, 128.8, 138.7, 139.6, 149.0, 189.8. HRMS (EI) calcd. for C19H19NO (M+) 277.1461, found 277.1460.

**(2*R*)-2,3-dihydro-2-phenyl-1-((*R*)-1-phenylethyl)pyridine-4-(1*H*)-one (3a diastereomer)**

IR (neat): 3029, 2975, 1639, 1590, 1494, 1451, 1393, 1294, 1152, 762, 700 cm-1. 1H NMR (CDCl3) δ 1.60 (d, 3H, *J* = 7.0 Hz), 2.55-2.88 (m, 2H), 4.28 (q, 1H, *J* = 6.8 Hz), 4.70 (dd, 1H, *J* = 6.8, 8.8 Hz), 5.14 (d, 1H, *J* = 7.5 Hz), 7.61 (d, 1H, *J* = 7.7 Hz), 7.09-7.42 (m, 10H). 13C NMR (CDCl3) δ 21.4, 43.9, 59.9, 60.6, 99.5, 125.9, 126.6, 127.8, 128.3, 12873, 128.9, 139.3, 141.8, 152.0, 190.4. HRMS (EI) calcd. for C19H19NO (M+) 277.1461, found 277.1460.

**(2*S,*2*R*)-2,3-dihydro-2-(4-methoxyphenyl)-1-((*R*)-1-phenylethyl)pyridine-4-(1*H*)-one 3b** (two diastereomers are observed)

IR (neat): 3030, 2969, 1639, 1588, 1575, 1511, 1453, 1295, 1250, 1150, 1030, 831, 772, 700 cm-1. 1H NMR (CDCl3) δ 1.48 (d, 3H, *J* = 7.2 Hz), 1.57 (d, 3H, *J* = 7,2 Hz), 2.57-2.83 (m, 2H), 3.83 (s, 3H), 4.31 (q, 1H, *J* = 7.2 Hz), 4.43 (q, 1H, *J* =7.2 Hz), 4.62- 4.67 (m, 1H,), 5.05 (d, 1H, *J* = 7.4 Hz), 5.15 (d, 1H, *J* = 7.4 Hz) 6.87-6.93 (m, 2H), 7.06 (d, 1H, *J* = 7.5 Hz), 7.14-7.17 (m, 2H), 7.27-7.42 (m, 2H), 7.61 (d, 1H, *J* = 7.7 Hz). 13C NMR (CDCl3) δ 17.4, 21.6, 43.8, 44.1, 55.3, 58.9, 59.7, 60.2, 60.7, 98.2, 99.7, 114.2, 125.8, 127.3, 127.5, 127.9, 128.1, 128.3, 128.7, 128.9, 131.1, 131.3, 139.6, 141.9, 149.3, 152.8, 159.6, 190.1, 190.8. HRMS (EI) calcd. for C20H21NO2 (MH+) 308.1645, found 308.1644.

**(2*S,*2*R*)-2,3-dihydro-2-(4-chlorophenyl)-1-((*R*)-1-phenylethyl)pyridine-4-(1*H*)-one 3c** (two diastereomers are observed)

IR (neat): 3030, 2969, 1634, 1569, 1556, 1490, 1454, 1297, 1243, 1149, 1091, 831, 766, 700 cm-1. 1H NMR (CDCl3) δ 1.48 (d, 3H, *J* = 7.2 Hz), 1.57 (d, 3H, *J* = 7,2 Hz), 2.60-2.72 (m, 2H), 4.29 (q, 1H, *J* = 7.0 Hz), 4.41- 4.52 (m, 2H), 4.70 (d, 1H, *J* = 6.8, 8.3 Hz), 5.20 (d, 1H, *J* = 7.5 Hz), 5.33 (d, 1H, *J* = 7.7 Hz), 7.12-7.38 (m, 9H), 7.69 (d, 1H, *J* = 7.5 Hz). 13C NMR (CDCl3) δ 18.8, 21.5, 42.4, 42.9, 59.5, 60.3, 60.6, 60.7, 98.0, 99.0, 125.9, 127.4, 128.2, 128.3, 128.5, 129.0, 129.3, 134.2, 136.8, 137.5, 139.0, 141.2, 151.0, 153.9, 190.3, 190.6. HRMS (EI) calcd. for C19H18ClNO (MH+) 312.1150, found 312.1154.

**(2*S,*2*R*)-2,3-dihydro-2-(4-nitrophenyl)-1-((*R*)-1-phenylethyl)pyridine-4-(1*H*)-one 3d** (two diastereomers are observed)

IR (neat): 3030, 2927, 1635, 1574, 1520, 1453, 1347, 1288, 1150, 856, 755, 701 cm-1. 1H NMR (CDCl3) δ 1.41 (d, 3H, *J* = 7.0 Hz), 1.56 (d, 3H, *J* = 6.8 Hz), 2.42 (dd, 2H, *J* = 4.25, 16.5Hz), 2.80-2.92 (m, 2H), 4.21 (q, 1H, *J* = 7.0 Hz), 4.40- 4.52 (m, 2H), 4.73 (dd, 1H, *J* = 7.0, 8.3 Hz), 4.96 (d, 1H, *J* = 7.5 Hz), 5.07 (d, 1H, *J* = 8.3 Hz), 7.08-7.46 (m, 9H), 7.61 (d, 1H, *J* = 8.3 Hz), 8.07 (d, 2H, *J* = 8.0 Hz). 13C NMR (CDCl3) δ 17.9, 21.0, 42.2, 42.6, 58.2, 59.6, 60.8, 61.2, 98.3, 99.0, 123.8, 125.6, 126.4, 126.7, 127.2, 127.3, 128.1, 128.3, 128.6, 128.8, 139.0, 140.9, 146.0, 146.8, 147.1, 148.7, 151.7, 188.3, 185.5. HRMS (EI) calcd. for C19H18N2O3 (M+) 322.1312, found 322.1314.

**(2*S,*2*R*)-2,3-dihydro-2-hexyl-1-((*R*)-1-phenylethyl)pyridine-4-(1*H*)-one 3e** (two diastereomers are observed)

IR (neat): 3030, 2927, 1634, 1575, 1454, 1395, 1287, 1238, 1200, 763, 700 cm-1. 1H NMR (CDCl3) δ 0.75-0.88 (m, 3H), 1.00-1.26 (m, 6H), 1.49 (d, 3H, *J* = 7.0 Hz), 1.56 (d, 3H, *J* = 7.0 Hz), 1.35-1.60 (m, 2H), 1.75-1.95 (m, 2H), 2.10 (d, 1H, *J* = 16.0 Hz), 2.25 (d, 1H, *J* = 16.5 Hz), 2.49-2.62 (m, 1H), 3.21-3.26 (m, 1H), 3.43-3.47 (m, 1H), 4.30- 4.50 (m, 1H), 4.76 (d, 1H, *J* = 7.5 Hz), 4.90 (d, 1H, *J* = 7.0 Hz), 6.82 (d, 1H, *J* = 7.5 Hz), 7.17-7.34 (m, 5H). 13C NMR (CDCl3) δ 18.7, 20.5, 21.5, 24.4, 24.5, 27.6, 28.1, 28.4, 28.7, 30.3, 30.6, 37.8, 37.9, 55.1, 60.3, 60.5, 95.4, 95.9, 124.8, 126.2, 127.0, 127.3, 127.6, 127.9, 128.5, 138.9, 141.6, 146.8, 149.3, 189.6, 189.7. HRMS (EI) calcd. for C19H27NO (MH+) 286.2165, found 286.2168.

**(2*S,*2*R*)-2,3-dihydro-2-isobutyl-1-((*R*)-1-phenylethyl)pyridine-4-(1*H*)-one 3f** (two diastereomers are observed)

IR (neat): 3030, 2955, 1634, 1575, 1454, 1395, 1293, 1273, 1217, 766, 700 cm-1. 1H NMR (CDCl3) δ 0.66-0.81 (m, 6H), 0.95-1.15 (m, 1H), 1.48 (d, 3H, *J* = 7.0 Hz), 1.56 (d, 3H, *J* = 7.0 Hz), 1.60-1.68 (m, 2H), 1.83-1.95 (m, 2H), 2.17 (d, 1H, *J* = 16.3 Hz), 2.28 (d, 1H, *J* = 16.5 Hz), 2.48-2.65 (m, 1H), 3.24-3.32 (m, 1H), 3.50-3.56 (m, 1H), 4.35 (q, 1H, *J* = 7.0 Hz), 4.48 (q, 1H, *J* = 7.0 Hz), 4.85 (d, 1H, *J* = 6.7Hz), 5.00 (d, 1H, *J* = 6.7 Hz), 6.88 (d, 1H, *J* = 7.0 Hz), 7.17-7.34 (m, 5H). 13C NMR (CDCl3) δ 19.3, 20.6, 21.0, 23.0, 23.7, 36.4, 36.9, 38.3, 53.5, 54.2, 60.7, 61.2, 95.7, 96.1, 125.4, 126.7, 127.5, 127.7, 128.4, 128.5, 139.4, 142.1, 147.3, 149.8, 189.8, 190.0. HRMS (EI) calcd. for C17H23NO (MH+) 258.1852, found 258.1861.
